# Supplementary material for: Damage-associated responses of the host contribute to defence against cyst nematodes but not root-knot nematodes
Source: PubMed Central journal article supplement (PMC5854129; doi:10.1093/jxb/erx374), 2017-10-19
Supplement: erx374_suppl_supplementary_figures_and_tables.pdf [file erx374_suppl_supplementary_figures_and_tables.pdf]

**Fig. S1: Genotyping for *pgip1-1* mutants.** Genomic DNA of Col-0 or knockout lines (*pgip1-1*; SALK\_001662.33.10.x) was PCR amplified using Left primer (LP), Right Primer (RP), and border primer (BP or LB1.3). The presence or absence of intact wild-type allele is shown. Expected size for wild-type (LP+RP) was 1117bp and for *pgip1-1* (BP+RP) 511-811bp. Primer sequences are given in Table S1.

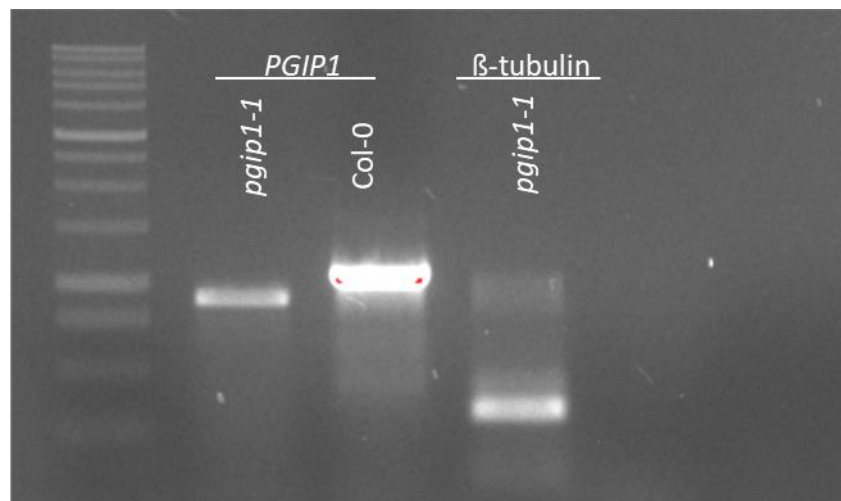

**Fig. S2: RT-PCR for presence or absence of gene expression in Col-0 or knockout mutants.** RNA from Col-0 or knockout lines (*pgip1-1*, *pgip1-2*, *pgip2-1*) was extracted to synthesize single stranded cDNA. The presence or absence of expression is shown using primers given in Table S2. UBQ5 was used as a positive control.

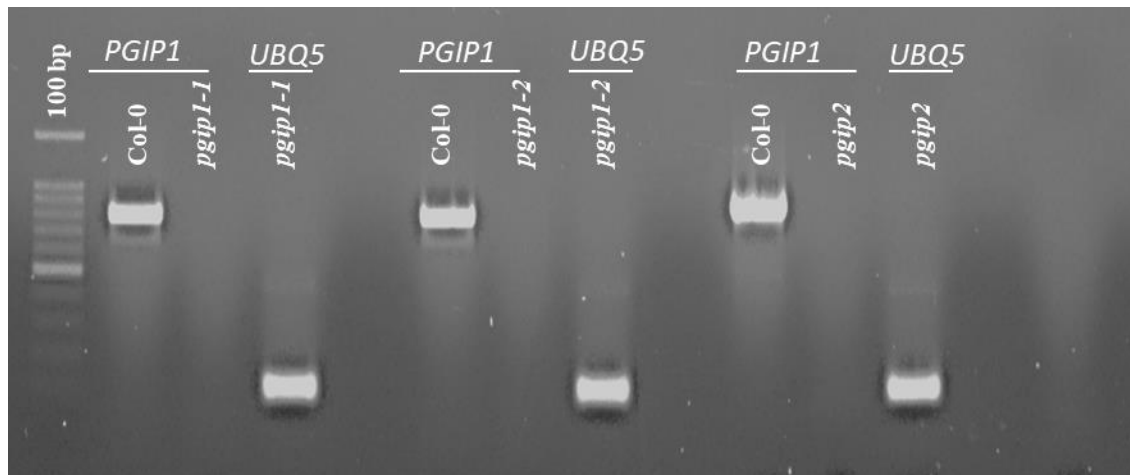

**Fig. S3: Cyst nematode infection assays in PGIP1 (*pgip1-2*) mutant lines.** (a) Average number of females and males per plant present in Col-0 and *pgip1-2* mutant lines at 12 dai. (b, c) Average sizes of female nematodes (b) and plant syncytia (c) in Col-0 and *pgip1-2* mutant lines. Bars represent mean  $\pm$  SE for three independent experiments. Data were analysed using student's T-test ( $P < 0.05$ ). Asterisks represent statistically significant difference to corresponding Col-0.

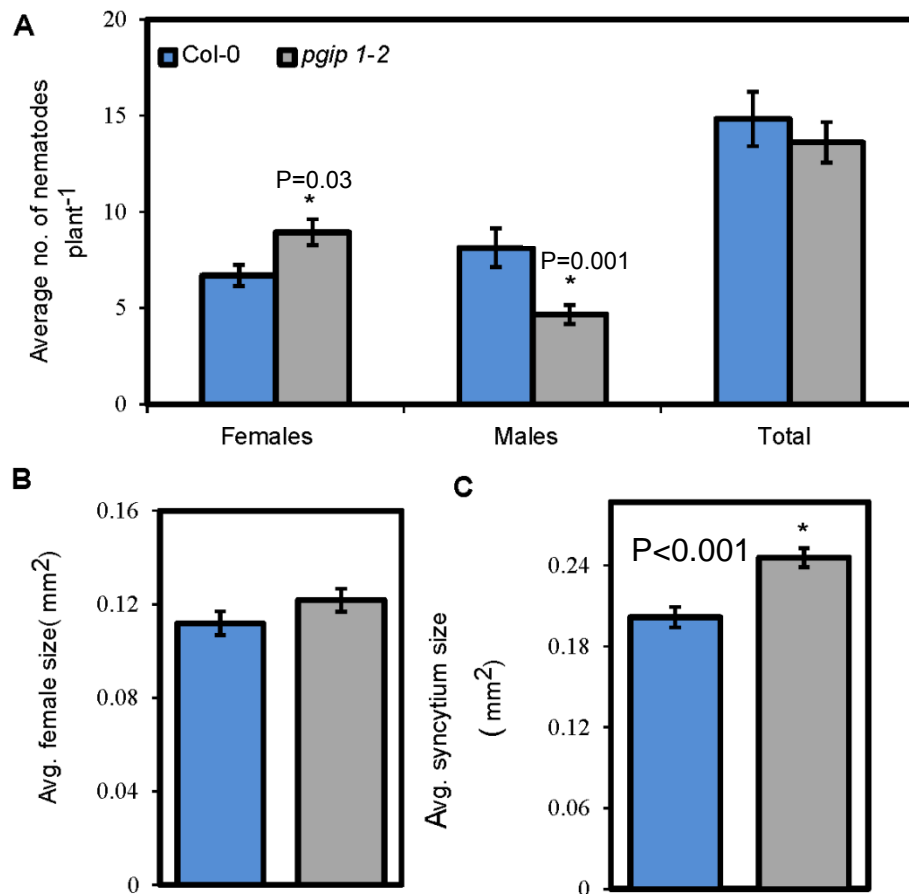

**Fig. S4: Cyst nematode infection assays in PGIP2 (*pgip2-1*) mutant lines.** (a) Average number of females and males per plant present in Col-0 and *pgip2-1* mutant lines at 12 dai. (b, c) Average sizes of female nematodes (b) and plant syncytia (c) in Col-0 and *pgip2-1* mutant lines. Bars represent mean  $\pm$  SE for three independent experiments. Data were analysed using student's T-test ( $P < 0.05$ ). Asterisks represent statistically significant difference to corresponding Col-0.

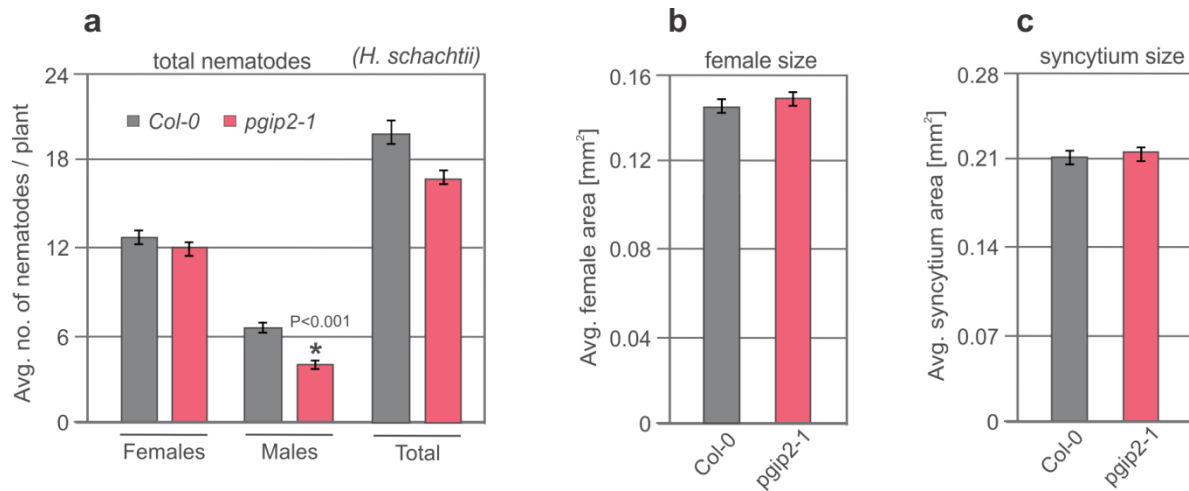

**Fig. S5: Cyst nematode infection assays in complementation lines for *PGIP1* (*35S::PGIP1/pgip1-1*) mutant lines.** Two independent homozygous lines overexpressing *PGIP1* in *pgip1-1* background (*35S::PGIP1/pgip1-1-L1*, *35S::PGIP1/pgip1-1-L2*) were selected and analysed for changes in transcript abundance of *PGIP*. *UBQ5* and  $\beta$ -*tubulin* were used as housekeeping genes to normalize the data. The values represent relative fold change in roots of transgenic lines with the value in uninfected Col-0 root set to one. (b, d) Average area of female nematodes (b) and plant syncytia (d) in Col-0 and *PGIP1* overexpression lines at 14 dai. (c) Average number of females and males per plant present in Col-0 and *PGIP1* overexpression lines at 12 dai. (b-d) Bars represent mean  $\pm$  SE for three independent experiments. Data were analysed using student's T-test ( $p < 0.05$ ). Asterisks represent statistically significant difference to corresponding Col-0.

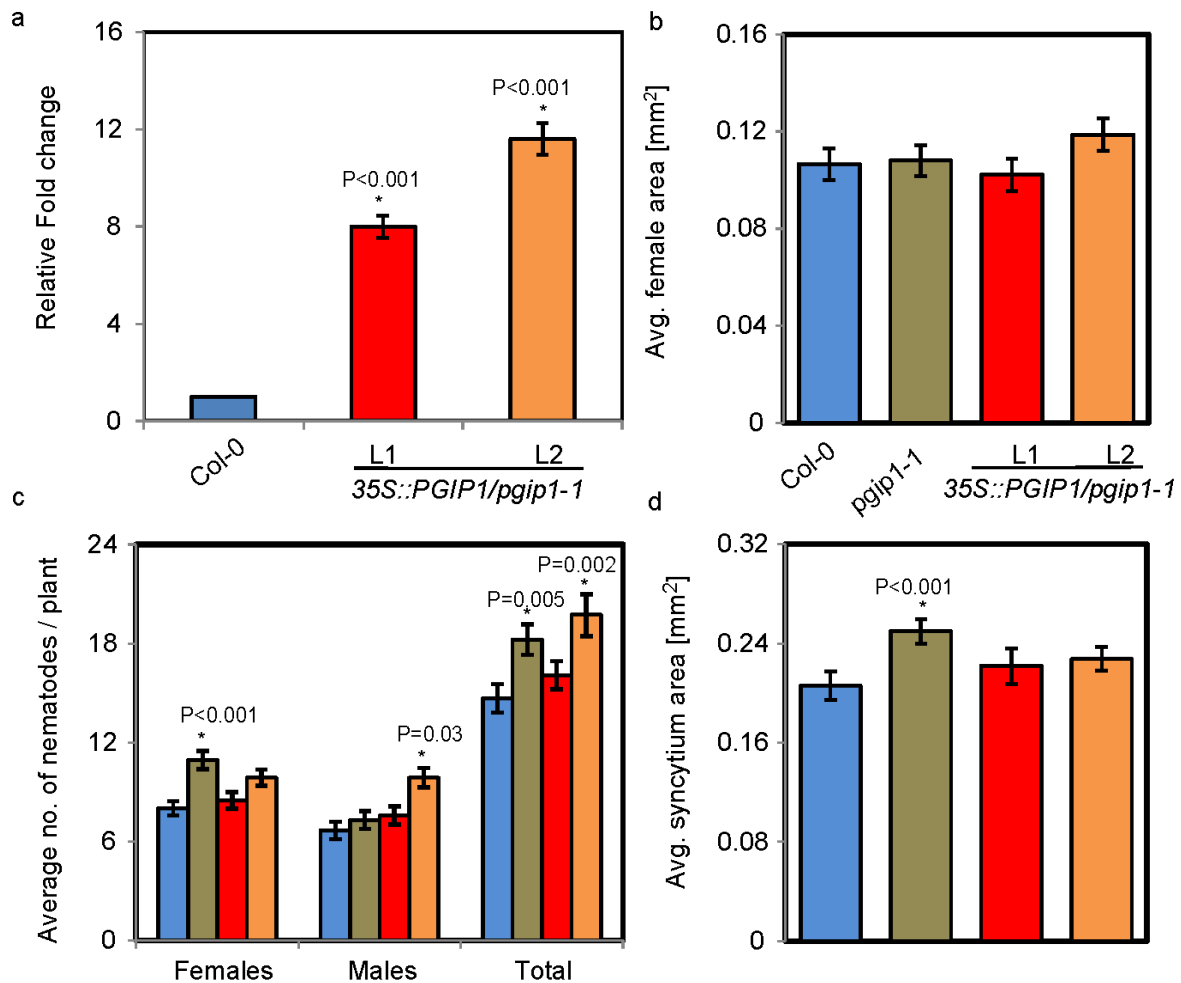

**Fig. S6: Cyst nematode infection assays in *PGIP2* overexpression lines.** (a) Two independent homozygous lines (L1, L2) overexpressing *PGIP2* (*35S::PGIP2*) were selected and analysed for changes in transcript abundance of *PGIP*. *UBQ5* and  $\beta$ -*tubulin* were used as housekeeping genes to normalize the data. The values represent relative fold change in roots of transgenic lines with the value in uninfected Col-0 root set to one. (b) Average number of females and males per plant present in Col-0 and *PGIP2* overexpression lines at 12 dai. (c, d) Average sizes of female nematodes (c) and plant syncytia (d) in Col-0 and *PGIP2* overexpression lines at 14 dai. (b-d) Bars represent mean  $\pm$  SE for three independent experiments. Data were analysed using student's T-test ( $p < 0.05$ ). Asterisks represent statistically significant difference to corresponding Col-0.

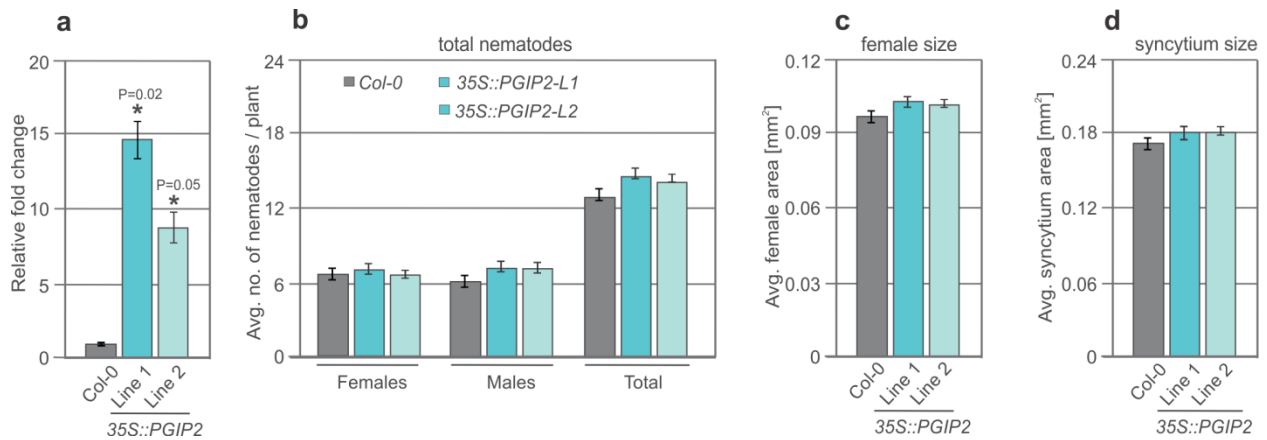

**Fig. S7: Root-knot nematode infection assays in *PGIP1* and *PGIP2* overexpression lines.** (a) Average number of galls per plant present in Col-0, and *PGIP* overexpression lines at 21 dai. (b) Average size of galls per plant present in Col-0 *PGIP* overexpression lines at 21 dai. Data were analysed using student's T-test ( $P < 0.05$ ).

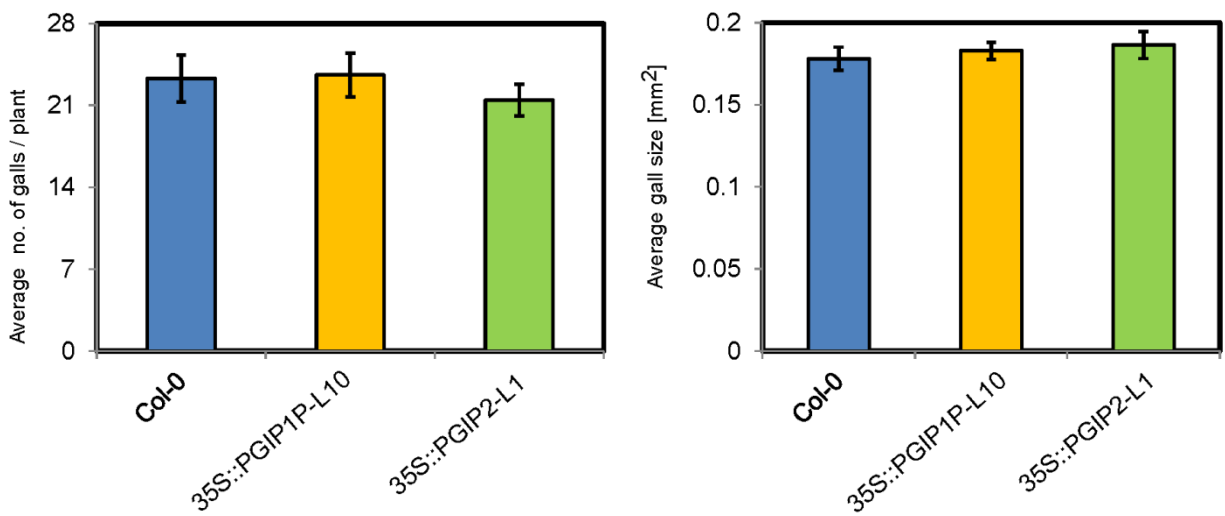

**Fig. 8: Cyst nematode infection assays upon OG treatment.** (a) Average number of females and males per plant present in water- or OG-treated Col-0 plants at 12 dai. (b, c) Average area of female nematodes (b) and plant syncytia (c) in water- or OG-treated Col-0 plants at 14 dai. (a-c) Bars represent mean  $\pm$  SE for three independent experiments. All data were analysed using student's T-test ( $p < 0.05$ ). Asterisks represent statistically significant difference to corresponding H<sub>2</sub>O treated Col-0.

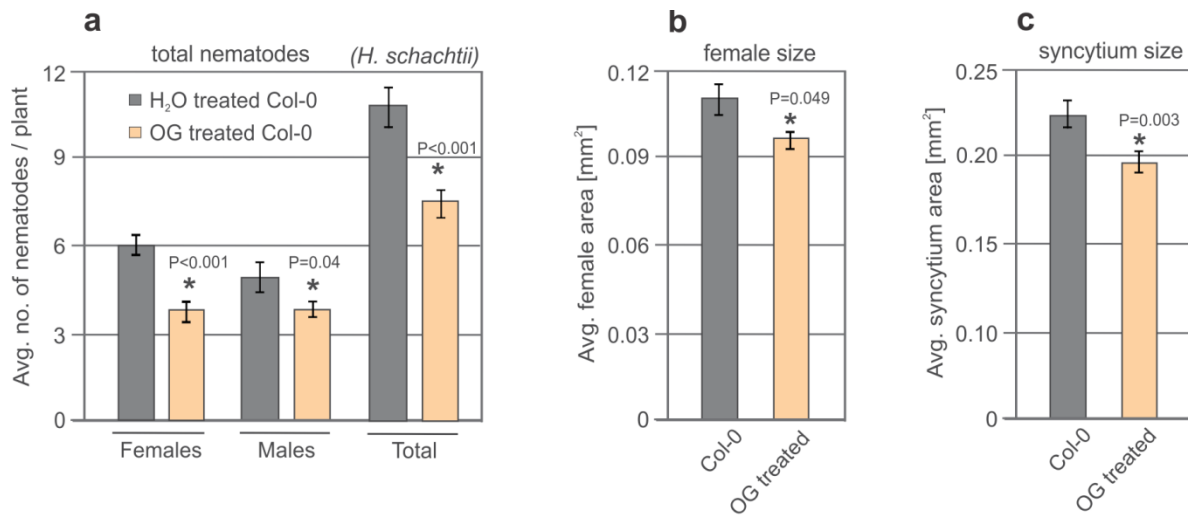



**Table S1** Primer sequences used in this work.

| Gene                 | Locus     | Forward Primer                                         | Reverse Primer                                          | Efficiency |
|----------------------|-----------|--------------------------------------------------------|---------------------------------------------------------|------------|
| <b>UBQ5</b>          | At3g62250 | GTTAAGCTCGCTGTTCTTCAGT                                 | TCAAGCTTCAACTCCTTCTTTC                                  | 98         |
| <b>JAZ8</b>          | At1g30135 | TGTGTTTTTCTTCAGATGTTACCC                               | TCTCTGCTTGCGATCGATATT                                   | 98         |
| <b>PROPEP1</b>       | At5g64900 | ACGAAGCGAAGAAAGTCACC                                   | TTCGGCTGTTTCGAAGTTCC                                    | 102        |
| <b>NPR2</b>          | At4g26120 | AAACCGAGTTGCACTTGCTC                                   | AGTGATGTCCGCTTTTCACC                                    | 106        |
| <b>PAD3</b>          | At3g26830 | TTAAGCTCGTGGTCAAGGAGAC                                 | GACCCATCGCATAAACGTTGAC                                  | 106        |
| <b>CYP81F2</b>       | At5g57220 | ATCGTGCTAGTGAACGCTTG                                   | TTCGTCCGTTACCAAACACC                                    | 95         |
| <b>CYP71A12</b>      | At2g30750 | GCTTCTTGAGATCCCTTGCG                                   | GTGATGTGGTGTGGTCC                                       | 98         |
| <b>PGIP1-qPCR</b>    | At5g06860 | AGTCCCTGACCTTCGCCTAT                                   | AGCATCACCTTGAGCTTGT                                     | 93         |
| <b>PGIP2-qPCR</b>    | At5g06870 | AACAAGCTTCAAGGCGATGC                                   | AACCTTGGAGAGATCGAACTGG                                  | 95         |
| <b>PGIP-RTPCR</b>    | At5g06860 | CTGACAGGTCCAATTCCTGAC                                  | AATCCATCAAATAAAACATTTTGAA                               |            |
| <b>PGIP2-RTPCR</b>   | At5g06870 | TCTTGTCCTCTCCTCTCA                                     | CCGGAATACTCCCTGTGATG                                    |            |
| <b>GWpPGIP1:GUS</b>  | At5g06860 | GGGGACAAGTTTGTACAAAAAGCA<br>GGCTGCAAAAGGGCAGGCTAGGCTAA | GGGGACCACTTTGTACAAGAAAGCT<br>GGGTCCTGAGGCAATGTCTTACCA   |            |
| <b>GWpPGIP2:GUS</b>  | At5g06870 | GGGGACAAGTTTGTACAAAAAGCAGGCTGC<br>ACCAAGCTTATCTCTAGGAT | GGGGACCACTTGACAAGAAAGCT<br>GGGTCGAGTTTTTATGGAACTATGATTG |            |
| <b>35S::PGIP1</b>    | At5g06860 | ATGGATAAGACAGCGACATTGTGTC                              | TTACTTGCAAATTTCAAGAGGAGCAC                              |            |
| <b>35S::PGIP2</b>    | At5g06870 | ATGGATAAGACAATGACTGTTC                                 | TCACTTGCAACTAGGAAGAGG                                   |            |
| <b>Left primer</b>   |           | CTGACAGGTCCAATTCCTGAC                                  |                                                         |            |
| <b>Right primer</b>  |           | TATGAATGCATGGTGCATAC                                   |                                                         |            |
| <b>Border primer</b> |           | ATTTTGCCGATTCGGAAC                                     |                                                         |            |

**Table S2:** An overview of PGIP1 and PGIP2 expression in published and unpublished transcriptomic data. Values are relative fold change. Asterisks indicate significant difference to control.

| Locus     | Gene Name | Root vs Sync<br>(5+15 dpi)<br>Szakasits et al., 2009 | Root vs migratory stage<br>(10 hpi)<br>Mendy et al., (2017) |
|-----------|-----------|------------------------------------------------------|-------------------------------------------------------------|
| At5g06860 | PGIP1     | 3.40 *                                               | 3.98 *                                                      |
| At5g06870 | PGIP2     | 0.70                                                 | 1.07                                                        |
